# Supplementary material
Source: publisher site journal article supplement (https://www.dovepress.com/article/352307)
Supplement: Supplementary file 1 [file get_supplementary_file.php]

Supplementary materials

Outline

[Table S1 Comparison of identification performance in Gram-negative 2](#_Toc89718481)

[Table S2 Comparison of identification performance in Gram-positive 2](#_Toc89718482)

[Table S3 Comparison of identification performance in yeast 5](#_Toc89718483)

[Table S4 Comparison of identification performance in mould 7](#_Toc89718484)

[Table S5 Comparison of identification performance in anaerobe 9](#_Toc89718485)

[Table S6 Detail Identification results record for Mycobacterium 9](#_Toc89718486)

# Table S1 Comparison of identification performance in Gram-negative

| Comparison of identification performance in Gram-negative | | | | | |
| --- | --- | --- | --- | --- | --- |
| N | Strain number | Bacteria name | Strain source | Score of EXS3000 | Score of Autof ms1000 |
| 1 | ATCC 25922 | Escherichia coli | Standard bacteria | 2.58 | 9.646 |
| 2 | 308298 | Escherichia coli | Clinical bacteria | 2.17 | 9.466 |
| 3 | 108737 | Escherichia coli | Clinical bacteria | 2.61 | 9.59 |
| 4 | 101141 | Escherichia coli | Clinical bacteria | 2.63 | 9.638 |
| 5 | 107500 | Escherichia coli | Clinical bacteria | 2.48 | 9.656 |
| 6 | 109075 | Pseudomonas aeruginosa | Clinical bacteria | 2.39 | 9.522 |
| 7 | 307819 | Morganella morganii | Clinical bacteria | 2.31 | 9.588 |
| 8 | 107553 | Stenotrophomonas maltophilia | Clinical bacteria | 2.31 | 9.317 |
| 9 | 106158 | Pseudomonas aeruginosa | Clinical bacteria | 2.32 | 9.17 |
| 10 | 107505 | Enterobacter aerogenes | Clinical bacteria | 2.39 | 9.606 |
| 11 | 108374 | Klebsiella pneumoniae | Clinical bacteria | 2.34 | 9.292 |
| 12 | 107024 | Klebsiella pneumoniae | Clinical bacteria | 2.324 | 9.54 |
| 13 | 103843 | Klebsiella oxytoca | Clinical bacteria | 2.462 | 9.582 |
| 14 | 307812 | Escherichia coli | Clinical bacteria | 2.27 | 9.576 |
| 15 | 108021 | Citrobacter koseri | Clinical bacteria | 2.42 | 9.622 |
| 16 | 107864 | Citrobacter koseri | Clinical bacteria | 2.44 | 9.72 |
| 17 | 303506 | Citrobacter freundii | Clinical bacteria | 2.43 | 9.606 |
| 18 | 107337 | Acinetobacter pittii | Clinical bacteria | 2.19 | 9.544 |
| 19 | 103270 | Acinetobacter junii | Clinical bacteria | 2.29 | 9.535 |
| 20 | 105048 | Acinetobacter pittii | Clinical bacteria | 2.42 | 9.544 |
| 21 | 107510 | Acinetobacter baumannii | Clinical bacteria | 2.07 | 9.473 |
| 22 | 107392 | Acinetobacter baumannii | Clinical bacteria | 2.38 | 9.531 |
| 23 | 306530 | Acinetobacter baumannii | Clinical bacteria | 2.2 | 9.282 |
| 24 | 102290 | Aeromonas caviae | Clinical bacteria | 2.48 | 9.406 |
| 25 | 108615 | Serratia marcescens | Clinical bacteria | 2.46 | 9.611 |
| 26 | 307296 | Enterobacter cloacae | Clinical bacteria | 2.71 | 9.233 |
| 27 | 101337 | Enterobacter cloacae | Clinical bacteria | 2.11 | 9.259 |
| 28 | 105764 | proteus mirabilis | Clinical bacteria | 2.58 | 9.721 |
| 29 | 103671 | proteus penneri | Clinical bacteria | 2.36 | 9.748 |
| 30 | 107488 | proteus vulgaris | Clinical bacteria | 2.43 | 9.66 |
| 31 | 192938 | Salmonella spp | Clinical bacteria | 2.38 | 9.63 |
| 32 | EQA | Enterobacter aerogenes | Clinical bacteria | 2.11 | 9.532 |
| 33 | 108939 | Enterobacter aerogenes | Clinical bacteria | 2.39 | 9.587 |
| 34 | 104745 | Enterobacter asburiae | Clinical bacteria | 2.21 | 9.528 |
| 35 |  | *Roseomonas mucosa* | Clinical bacteria | 2.02 | 9.336 |
| 36 | JX | *Methylobacterium rhodesianum* | Clinical bacteria | 1.78 | 6.027 |
| 37 | 108010 | Chryseobacterium indologenes | Clinical bacteria | 1.5 | 8.843 |
| 38 | 106587 | Chryseobacterium indologenes | Clinical bacteria | 1.76 | 8.71 |
| 39 | 103211 | Achromobacter xylosoxidans | Clinical bacteria | 2.43 | 9.438 |
| 40 | 101795 | Achromobacter xylosoxidans | Clinical bacteria | 2.41 | 9.458 |
| 41 | 107357 | Chryseobacter meningosepticum | Clinical bacteria | 2.37 | 9.635 |
| 42 | 105319 | Chryseobacter meningosepticum | Clinical bacteria | 2.32 | 9.444 |
| 43 | 300628 | Elizabethkingiameningospetica | Clinical bacteria | 2.23 | 9.545 |
| 44 | 107243 | Sphingobacterium multivorum | Clinical bacteria | 1.79 | 6.658 |
| 45 | 107381 | Morganella morganii | Clinical bacteria | 2.63 | 9.666 |
| 46 | 106918 | Morganella morganii | Clinical bacteria | 2.6 | 9.708 |
| 47 |  | Morganella morganii | Clinical bacteria | 2.31 | 9.588 |
| 48 | 105469 | Vibrio alginolyticus | Clinical bacteria | 2.19 | 9.307 |
| 49 | 307007 | Salmonella spp | Clinical bacteria | 2.14 | 9.785 |
| 50 | 304844 | Ralstonia pickettii | Clinical bacteria | 2.25 | 9.444 |
| 51 | 103687 | Gardnerella vaginalis | Clinical bacteria | 2.64 | 9.647 |
| 52 | 100976 | Raoultella ornithinolytica | Clinical bacteria | 2.48 | 9.643 |
| 53 |  | Aeromonas veronii | Clinical bacteria | 2.5 | 9.591 |
| 54 |  | Escherichia coli | Clinical bacteria | 2.31 | 9.569 |
| 55 |  | Eikenella corrodens | Clinical bacteria | 2.47 | 9.586 |
| 56 | 107240 | Pseudomonas putida | Clinical bacteria | 2.04 | 9.271 |
| 57 | 303417 | Ralstonia mannitolilytica | Clinical bacteria | 2.13 | 9.149 |
| 58 | 303406 | Ralstonia mannitolilytica | Clinical bacteria | 2.14 | 9.242 |
| 59 | 107793 | Lautropia mirabilis | Clinical bacteria | 1.26 | 9.071 |
| 60 | 305037 | Salmonella enteritidis | Clinical bacteria | 2.34 | 9.721 |
| 61 | 107493 | Providencia rettgeri | Clinical bacteria | 2.25 | 9.406 |
| 62 |  | Stenotrophomonas maltophilia | Clinical bacteria | 2.29 | 9.42 |
| 63 |  | Stenotrophomonas maltophilia | Clinical bacteria | 2.31 | 9.317 |
| 64 | QC | Stenotrophomonas maltophilia | Clinical bacteria | 2.58 | 5.825 |
| 65 | 303951 | Moraxella spp | Clinical bacteria | 1.86 | 9.273 |
| 66 | 109191 | Moraxella catarrhalis | Clinical bacteria | 2.41 | 9.482 |
| 67 | 109557 | Moraxella catarrhalis | Clinical bacteria | 2.3 | 9.608 |
| 68 | 306072 | Moraxella osloensis | Clinical bacteria | 2.19 | 6.357 |
| 69 |  | Nesseria spp | Clinical bacteria | 2.24 | 9.617 |
| 70 |  | Haemophilus influenzae | Clinical bacteria | 2.67 | 9.714 |

# Table S2 Comparison of identification performance in Gram-positive

| 2 Comparison of identification performance in Gram-positive | | | | | |
| --- | --- | --- | --- | --- | --- |
| N | Strain number | Bacteria name | Strain source | Score of EXS3000 | Score of Autof ms1000 |
| 1 | 101694 | Staphylococcus aureus | Clinical bacteria | 2.32 | 9.601 |
| 2 | 305652 | Staphylococcus aureus | Clinical bacteria | 2.38 | 9.611 |
| 3 | 107507 | Gemella haemolysans | Clinical bacteria | 2.63 | 9.393 |
| 4 | 308200 | Staphylococcus epidermidis | Clinical bacteria | 2.48 | 9.39 |
| 5 | 107739 | Staphylococcus caprae | Clinical bacteria | 2.1 | 9.086 |
| 6 | 307313 | Staphylococcus warneri | Clinical bacteria | 2.31 | 9.306 |
| 7 | 307625 | Staphylococcus hominis | Clinical bacteria | 2.3 | 8.14 |
| 8 | 306431 | Staphylococcus hominis | Clinical bacteria | 2.18 | 9.326 |
| 9 | 302205 | Enterococcus faecalis | Clinical bacteria | 2.54 | 9.669 |
| 10 | 306493 | Enterococcus faecalis | Clinical bacteria | 2.52 | 9.627 |
| 11 | 101868 | Enterococcus faecalis | Clinical bacteria | 2.19 | 9.696 |
| 12 | 309868 | Enterococcus casseliflavus | Clinical bacteria | 2.53 | 9.733 |
| 13 | 309871 | Enterococcus casseliflavus | Clinical bacteria | 2.57 | 9.679 |
| 14 | 103731 | Enterococcus casseliflavus | Clinical bacteria | 2.54 | 9.662 |
| 15 | 109408 | Enterococcus avium | Clinical bacteria | 2.14 | 9.063 |
| 16 | 100932 | Enterococcus avium | Clinical bacteria | 2.55 | 9.636 |
| 17 | 108299 | Streptococcus agalactiae | Clinical bacteria | 2.61 | 9.656 |
| 18 | 108996 | Streptococcus agalactiae | Clinical bacteria | 2.55 | 9.685 |
| 19 | 106600 | Streptococcus anginosus | Clinical bacteria | 2.39 | 9.637 |
| 20 | 106347 | Streptococcus anginosus | Clinical bacteria | 2.64 | 9.627 |
| 21 | 309557 | Streptococcus mitis | Clinical bacteria | 2.45 | 9.407 |
| 22 | 104709 | Streptococcus mitis | Clinical bacteria | 2.18 | 9.359 |
| 23 | 306189 | Streptococcus constellatus | Clinical bacteria | 2.55 | 9.631 |
| 24 | 300321 | Streptococcus sanguinis | Clinical bacteria | 2.34 | 9.611 |
| 25 | 310343 | Micrococcus luteus | Clinical bacteria | 2.03 | 9.335 |
| 26 |  | Rhodococcus ruber | Clinical bacteria | 2.14 | 9.457 |
| 27 | 100343 | Streptococcus pyogenes | Clinical bacteria | 2.5 | 9.646 |
| 28 | 102748 | Streptococcus parasanguinis | Clinical bacteria | 2.12 | 9.231 |
| 29 | QC | Streptococcus gallolyticus | Clinical bacteria | 2.22 | 9.335 |
| 30 |  | Nocardia beijingensis | Clinical bacteria | 1.84 | 9.657 |
| 31 |  | Nocardia asiatica | Clinical bacteria | 1.99 | 9.54 |
| 32 |  | Nocardia asiatica | Clinical bacteria | 2.02 | 9.194 |
| 33 | EQA | Erysipelothrix rhusiopathiae | Clinical bacteria | 2.42 | 9.513 |
| 34 | 306859 | *Corynebacterium pilosum* | Clinical bacteria | 2.08 | 9.034 |
| 35 | 102247 | Corynebacterium pilosum | Clinical bacteria | 2.08 | 9.009 |
| 36 | 106314 | Corynebacterium urealyticum | Clinical bacteria | 2.54 | 9.528 |
| 37 | 109642 | Corynebacterium urealyticum | Clinical bacteria | 2.41 | 9.532 |
| 38 | 109513 | Corynebacterium urealyticum | Clinical bacteria | 2.29 | 9.56 |
| 39 | 301118 | Corynebacterium afermentans | Clinical bacteria | 1.73 | 9.029 |
| 40 | 307940 | *Actinobaculum schaalii* | Clinical bacteria | 2.17 | 8.082 |
| 41 | 101747 | Actinobaculum schaalii | Clinical bacteria | 2.42 | 9.015 |
| 42 | 307949 | Actinobaculum schaalii | Clinical bacteria | 2.37 | 9.393 |
| 43 | 105441 | Corynebacterium glucuronolyticum | Clinical bacteria | 2.02 | 9.663 |
| 44 | 304460 | Corynebacterium tuberculostearicum | Clinical bacteria | 2.32 | 9.585 |
| 45 | 308562 | Corynebacterium tuberculostearicum | Clinical bacteria | 2.19 | 9.011 |
| 46 | 102458 | Corynebacterium amycolatum | Clinical bacteria | 2.3 | 9.518 |
| 47 | 105000 | Corynebacterium singulare | Clinical bacteria | 2.4 | 9.056 |
| 48 | 103347 | Actinomadura madure | Clinical bacteria | 2.38 | 9.5 |
| 49 | 310197 | Corynebacterium singulare | Clinical bacteria | 2.53 | 9.253 |
| 50 | 310424 | Bacillus spp | Clinical bacteria | 1.93 | 9.214 |
| 51 | 302424 | Bacillus thuringiensis | Clinical bacteria | 2.34 | 5.261 |
| 52 |  | Enterococcus avium | Clinical bacteria | 2.13 | 9.606 |
| 53 |  | Actinomadura pelletieri | Clinical bacteria | 2.64 | 9.502 |
| 54 |  | Actinomadura madure | Clinical bacteria | 2.21 | 9.255 |
| 55 |  | Actinomadura latina | Clinical bacteria | 2.12 | 8.746 |
| 56 | 308339 | Streptococcus mutans | Clinical bacteria | 2.27 | 5.47 |
| 57 | 104750 | Streptococcus pneumoniae | Clinical bacteria | 2.32 | 9.54 |
| 58 | 308474 | Staphylococcus haemolyticus | Clinical bacteria | 2.04 | 9.141 |

# Table S3 Comparison of identification performance in yeast

| 3 Comparison of identification performance in yeast | | | | | |
| --- | --- | --- | --- | --- | --- |
| N | Strain number | Bacteria name | Strain source | Score of EXS3000 | Score of Autof ms1000 |
| 1 |  | Candida tropicalis | Clinical bacteria | 2.11 | 9.008 |
| 2 |  | Candida glabrata | Clinical bacteria | 2.02 | 9.282 |
| 3 |  | Candida parapsilosis | Clinical bacteria | 1.9 | 9.308 |
| 4 |  | Cryptococcus neoformans | Clinical bacteria | 2.05 | 9.18 |
| 5 |  | Candida krusei | Clinical bacteria | 2.02 | 9.309 |
| 6 |  | Candida guilliermondii | Clinical bacteria | 2.31 | 9.696 |
| 7 |  | Candida parapsilosis | Clinical bacteria | 2.14 | 9.595 |
| 8 |  | Candida parapsilosis | Clinical bacteria | 2.59 | 9.577 |
| 9 |  | Candida albicans | Clinical bacteria | 2.04 | 9.265 |
| 10 |  | Candida albicans | Clinical bacteria | 2.05 | 9.513 |
| 11 |  | Candida albicans | Clinical bacteria | 2.16 | 9.447 |
| 12 |  | Candida albicans | Clinical bacteria | 2.13 | 9.353 |
| 13 |  | Candida parapsilosis | Clinical bacteria | 2.04 | 9.143 |
| 14 |  | Candida parapsilosis | Clinical bacteria | 2.15 | 9.502 |
| 15 |  | Candida parapsilosis | Clinical bacteria | 2.31 | 9.358 |
| 16 |  | Candida parapsilosis | Clinical bacteria | 2.17 | 9.509 |
| 17 |  | Candida parapsilosis | Clinical bacteria | 2.04 | 9.466 |
| 18 |  | Candida parapsilosis | Clinical bacteria | 2.12 | 9.473 |
| 19 |  | Candida guilliermondii | Clinical bacteria | 2.08 | 9.031 |
| 20 |  | Candida tropicalis | Clinical bacteria | 2.16 | 9.215 |
| 21 |  | Candida tropicalis | Clinical bacteria | 2.15 | 9.526 |
| 22 |  | Rhodotorula minuta | Clinical bacteria | 2.13 | 9.707 |
| 23 |  | Cryptococcus neoformans | Clinical bacteria | 2.28 | 9.522 |
| 24 |  | Candida albicans | Clinical bacteria | 2.15 | 9.274 |
| 25 |  | Candida parapsilosis | Clinical bacteria | 1.73 | 9.59 |
| 26 |  | Prototheca wickerhamii | Clinical bacteria | 2.41 | 9.259 |
| 27 |  | Prototheca wickerhamii | Clinical bacteria | 2.38 | 9.18 |
| 28 |  | Prototheca wickerhamii | Clinical bacteria | 2.27 | 9.375 |
| 29 |  | Prototheca wickerhamii | Clinical bacteria | 2.11 | 9.015 |
| 30 |  | Prototheca wickerhamii | Clinical bacteria | 2.19 | 8.672 |
| 31 |  | Prototheca zopfii | Clinical bacteria | 2.66 | 9.276 |
| 32 |  | Prototheca zopfii | Clinical bacteria | 2.37 | 9.117 |
| 33 |  | Prototheca zopfii | Clinical bacteria | 2.18 | 6.409 |

# Table S4 Comparison of identification performance in mould

| 4 Comparison of identification performance in mould | | | | | |
| --- | --- | --- | --- | --- | --- |
| N | Strain number | Bacteria name | Strain source | Score of EXS3000 | Score of Autof ms1000 |
| 1 |  | Penicillium citrinum | Clinical bacteria | 2.22 | 9.627 |
| 2 |  | Paecilomyces lilacinus | Clinical bacteria | 2.34 | 9.38 |
| 3 |  | Paecilomyces lilacinus | Clinical bacteria | 1.86 | 9.255 |
| 4 |  | Cladosporium | Clinical bacteria | 1.54 | 8.701 |
| 5 |  | Aspergillus flavus | Clinical bacteria | 1.84 | 9.166 |
| 6 |  | *Acremonium strictum* | Clinical bacteria | 2.23 | 9.542 |
| 7 |  | Ahernaria alternate | Clinical bacteria | 2.14 | 9.079 |
| 8 |  | Cladosporium | Clinical bacteria | 2.28 | 9.478 |
| 9 |  | Aspergillus versicolor | Clinical bacteria | 2.26 | 9.489 |
| 10 |  | Aspergillus terreus | Clinical bacteria | 2.41 | 9.378 |
| 11 |  | Aspergillus niger | Clinical bacteria | 2.08 | 8.341 |
| 12 |  | Aspergillus terreus | Clinical bacteria | 2.13 | 9.166 |
| 13 |  | Aspergillus fumigatus | Clinical bacteria | 2.16 | 9.414 |
| 14 |  | Aspergillus oryzae | Clinical bacteria | 2.21 | 9.342 |
| 15 |  | *Trichophyton interdigitale* | Clinical bacteria | 2.38 | 9.26 |
| 16 |  | *Acremonium strictum* | Clinical bacteria | 1.75 | 6.448 |
| 17 |  | Aspergillus terreus | Clinical bacteria | 2.3 | 8.515 |
| 18 |  | Sporothrix schenckii | Clinical bacteria | 2.42 | 9.332 |
| 19 |  | Aspergillus nidulans | Clinical bacteria | 2.3 | 9.438 |
| 20 |  | Cladosporium | Clinical bacteria | 2.32 | 9.406 |
| 21 |  | *Trichophyton interdigitale* | Clinical bacteria | 2.49 | 9.284 |
| 22 |  | Sporothrix schenckii | Clinical bacteria | 2.34 | 9.387 |
| 23 |  | Aspergillus fumigatus | Clinical bacteria | 2.41 | 9.532 |
| 24 |  | Sporothrix schenckii | Clinical bacteria | 2.39 | 9.565 |
| 25 |  | Sporothrix schenckii | Clinical bacteria | 2.35 | 5.333 |
| 26 |  | *Trichophyton interdigitale* | Clinical bacteria | 2.39 | 9.54 |
| 27 |  | Microascus trigonosporus | Clinical bacteria | 1.62 | 6.138 |
| 28 |  | Aspergillus niger | Clinical bacteria | 2.31 | 9.559 |
| 29 |  | Cladosporium | Clinical bacteria | 2.18 | 9.386 |
| 30 |  | Cladosporium | Clinical bacteria | 2.27 | 9.498 |
| 31 |  | Aspergillus restrictus | Clinical bacteria | 1.76 | 6.643 |
| 32 |  | Aspergillus oryzae | Clinical bacteria | 2.15 | 9.484 |
| 33 |  | Trichosporon interdigitale | Clinical bacteria | 2.59 | 9.577 |

# Table S5 Comparison of identification performance in anaerobe

| 5 Comparison of identification performance in anaerobe | | | | | |
| --- | --- | --- | --- | --- | --- |
| N | Strain number | Bacteria name | Strain source | Score of EXS3000 | Score of Autof ms1000 |
| 1 | 304988 | Bacteroides caccae | Clinical bacteria | 2.23 | 9.582 |
| 2 | 304172 | Bacteroides ovatus | Clinical bacteria | 2.34 | 9.56 |
| 3 | 304080 | Bacteroides fragilis | Clinical bacteria | 2.59 | 9.744 |
| 4 | 304264 | Bacteroides fragilis | Clinical bacteria | 2.52 | 9.638 |
| 5 | 304590 | Bacteroides fragilis | Clinical bacteria | 2.34 | 9.557 |
| 6 | 340591 | Bacteroides fragilis | Clinical bacteria | 2.59 | 9.742 |
| 7 | 308018 | Bacteroides thetaiotaomicron | Clinical bacteria | 2.23 | 9.324 |
| 8 | 304117 | Bacteroides thetaiotaomicron | Clinical bacteria | 2.29 | 9.657 |
| 9 | 106278 | *Clostridium innocuum* | Clinical bacteria | 2.46 | 9.621 |
| 10 |  | Clostridium innocuum | Clinical bacteria | 2.25 | 9.406 |
| 11 | EQA | Clostridium sporogenes | Clinical bacteria | 2.17 | 9.694 |
| 12 |  | Clostridium sporogenes | Clinical bacteria | 2.22 | 9.512 |
| 13 |  | Clostridium sporogenes | Clinical bacteria | 2.13 | 9.595 |
| 14 |  | Clostridium sordellii | Clinical bacteria | 2.29 | 9.515 |
| 15 |  | Clostridium paraputrificum | Clinical bacteria | 2.35 | 9.56 |

# Table S6 Detail Identification results record for Mycobacterium

| Species | EXS3000 | | Autof ms1000 | |
| --- | --- | --- | --- | --- |
| Identification results | Score | Identification results | Score |
| *Mycobacterium simiae* | *Mycobacterium simiae* | 2.14 | *Mycobacterium simiae* | 7.857 |
| *Mycobacterium simiae* | 2.17 | *Mycobacterium simiae* | 9.07 |
| *Mycobacterium simiae* | 2.15 | *Mycobacterium simiae* | 9.234 |
| *Mycobacterium simiae* | *Mycobacterium simiae* | 2.2 | *Mycobacterium simiae* | 8.728 |
| *Mycobacterium simiae* | 2.32 | *Mycobacterium simiae* | 9.415 |
| *Mycobacterium simiae* | 2.34 | *Mycobacterium simiae* | 9.515 |
| *Mycobacterium fortuitum* | *Mycobacterium fortuitum* | 2.24 | *Mycobacterium fortuitum* | 9.507 |
| *Mycobacterium fortuitum* | 2.19 | *Mycobacterium fortuitum* | 9.381 |
| *Mycobacterium fortuitum* | 2.3 | *Mycobacterium fortuitum* | 9.473 |
| *Mycobacterium abscessus* | Unreliable | 1.5 | *Mycobacterium abscessus* | 9.242 |
| Unreliable | 1.53 | *Mycobacterium abscessus* | 9.032 |
| Unreliable | 1.57 | *Mycobacterium abscessus* | 8.852 |
| *Mycobacterium fortuitum* | *Mycobacterium fortuitum* | 2.26 | *Mycobacterium fortuitum* | 9.515 |
| *Mycobacterium fortuitum* | 2.3 | *Mycobacterium fortuitum* | 9.47 |
| *Mycobacterium fortuitum* | 2.36 | *Mycobacterium fortuitum* | 9.507 |
| *Mycobacterium abscessus* | *Mycobacterium abscessus* | 1.75 | *Mycobacterium abscessus* | 8.835 |
| Unreliable | 1.65 | *Mycobacterium abscessus* | 9.178 |
| Unreliable | 1.68 | *Mycobacterium abscessus* | 9.317 |
| *Mycobacterium fortuitum* | *Mycobacterium fortuitum* | 2.38 | *Mycobacterium fortuitum* | 9.518 |
| *Mycobacterium fortuitum* | 2.5 | *Mycobacterium fortuitum* | 9.579 |
| *Mycobacterium fortuitum* | 2.5 | *Mycobacterium fortuitum* | 9.617 |
| *Mycobacterium simiae* | *Citrobacter braakii* | 1.79 | *Mycobacterium sherrisii* | 9.216 |
| *Mycobacterium simiae* | 1.87 | *Mycobacterium sherrisii* | 8.537 |
| *Mycobacterium simiae* | 2.02 | *Mycobacterium sherrisii* | 9.043 |
| *Mycobacterium fortuitum* | *Mycobacterium fortuitum* | 2.4 | *Mycobacterium fortuitum* | 9.531 |
| *Mycobacterium fortuitum* | 2.4 | *Mycobacterium fortuitum* | 9.631 |
| *Mycobacterium fortuitum* | 2.42 | *Mycobacterium fortuitum* | 9.604 |
| *Mycobacterium abscessus* | *Mycobacterium abscessus* | 1.84 | *Mycobacterium abscessus* | 9.407 |
| *Mycobacterium abscessus* | 1.9 | *Mycobacterium abscessus* | 9.192 |
| *Mycobacterium abscessus* | 1.9 | *Mycobacterium abscessus* | 9.204 |
| *Mycobacterium fortuitum* | *Mycobacterium fortuitum* | 2.42 | *Mycobacterium fortuitum* | 9.553 |
| *Mycobacterium fortuitum* | 2.38 | *Mycobacterium fortuitum* | 9.547 |
| *Mycobacterium fortuitum* | 2.36 | *Mycobacterium fortuitum* | 9.476 |
| *Mycobacterium intracellulare* | *Mycobacterium intracellulare* | 2.29 | *Mycobacterium chimaera* | 9.304 |
| *Mycobacterium intracellulare* | 2.31 | *Mycobacterium chimaera* | 9.336 |
| *Mycobacterium intracellulare* | 2.34 | *Mycobacterium chimaera* | 9.329 |
| *Mycobacterium mageritense* | *Mycobacterium mageritense* | 2.18 | *Mycobacterium mageritense* | 9.41 |
| *Mycobacterium mageritense* | 2.19 | *Mycobacterium mageritense* | 9.386 |
| *Mycobacterium mageritense* | 2.2 | *Mycobacterium mageritense* | 9.387 |
| *Mycobacterium fortuitum* | *Mycobacterium fortuitum* | 2.31 | *Mycobacterium fortuitum* | 9.425 |
| *Mycobacterium fortuitum* | 2.4 | *Mycobacterium fortuitum* | 9.559 |
| *Mycobacterium fortuitum* | 2.38 | *Mycobacterium fortuitum* | 9.527 |
| *Mycobacterium gordonae* | Unreliable | 1.44 | *Citrobacter freundii* | 7.527 |
| Unreliable | 1.44 | *Mycobacterium gordonae* | 5.909 |
| Unreliable | 1.5 | *Mycobacterium intracellulare* | 9.583 |
| *Mycobacterium intracellulare* | *Mycobacterium intracellulare* | 2.11 | *Mycobacterium intracellulare* | 9.009 |
| *Mycobacterium intracellulare* | 2.13 | *Mycobacterium chimaera* | 9.117 |
| *Mycobacterium intracellulare* | 2.07 | *Mycobacterium intracellulare* | #6.001 |
| *Mycobacterium intracellulare* | *Mycobacterium intracellulare* | 2.22 | *Mycobacterium intracellulare* | 9.276 |
| *Mycobacterium intracellulare* | 2.2 | *Mycobacterium intracellulare* | 9.516 |
| *Mycobacterium intracellulare* | 2.2 | *Mycobacterium intracellulare* | 9.532 |
| *Mycobacterium intracellulare* | *Mycobacterium intracellulare* | 2.29 | *Mycobacterium chimaera* | 9.232 |
| *Mycobacterium intracellulare* | 2.36 | *Mycobacterium chimaera* | 9.297 |
| *Mycobacterium intracellulare* | 2.31 | *Mycobacterium chimaera* | 9.343 |
| *Mycobacterium intracellulare* | *Mycobacterium intracellulare* | 2.22 | *Mycobacterium intracellulare* | 9.54 |
| *Mycobacterium intracellulare* | 2.32 | *Mycobacterium intracellulare* | 9.55 |
| *Mycobacterium intracellulare* | 2.22 | *Mycobacterium intracellulare* | 9.526 |

The identification result of EXS3000 was interpreted as “reliable species identification” for score greater than 2.00 points, “reliable genus identification” for score range between 1.70-1.99, “no reliable identification” for score less than 1.70 points.

The identification result of Autof ms1000 was interpreted as “reliable species identification” for range 9.000-10.000, “reliable genus identification” for range 6.000-8.999, “no reliable identification” for range < 6.000.
